# Supplementary material for: Expansion of highly interferon‐responsive T cells in early‐onset Alzheimer's disease
Source: PubMed Central journal article supplement — Alzheimers Dement. 2024 Jun 3;20(7):5062–70. doi: 10.1002/alz.13892 (PMC11247696; doi:10.1002/alz.13892), 2024-06-03
Supplement: ALZ-20-5062-s002.pdf [file ALZ-20-5062-s002.pdf]

## A ISAG<sup>hi</sup> T cells in familial tauopathy and EOAD

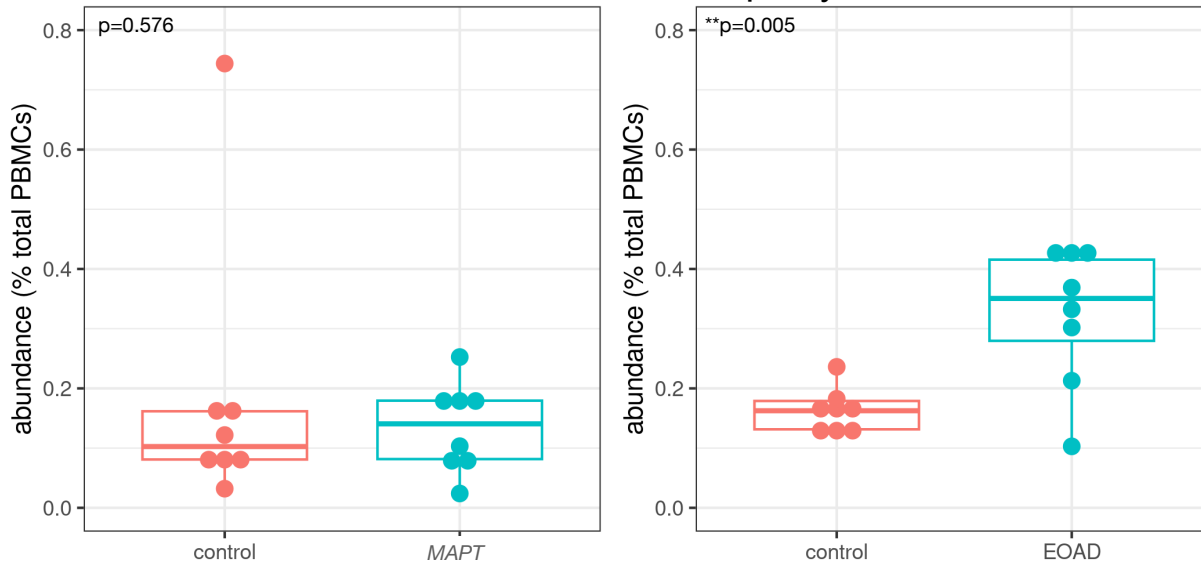

## B Non-classical monocytes in familial tauopathy and EOAD

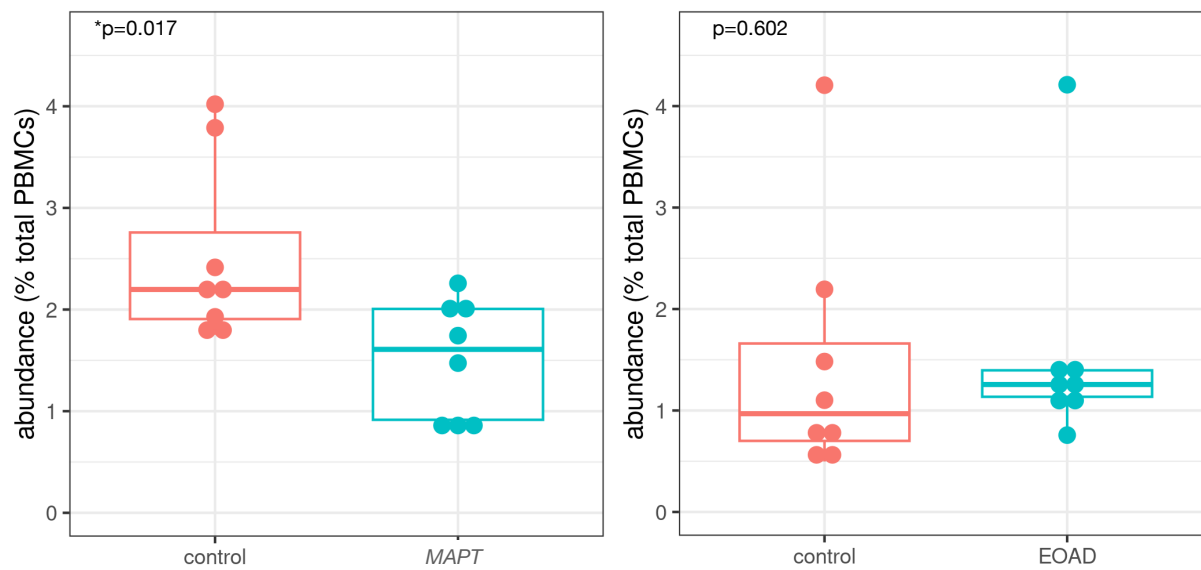

### Figure S3. Analysis of changes in cell-type abundance in familial tauopathy and EOAD.

**A**, Analysis of changes in ISAG<sup>hi</sup> T-cell abundance in the present study and an independent study focusing on familial tauopathy revealed a specific expansion in EOAD ( $P = 0.005$ ). **B**, Similar analysis of changes in non-classical monocyte abundance revealed that the reduction in non-classical monocytes is specific to familial tauopathy ( $P = 0.017$ ).
