# Supplementary material for: Expansion of highly interferon‐responsive T cells in early‐onset Alzheimer's disease
Source: PubMed Central journal article supplement — Alzheimers Dement. 2024 Jun 3;20(7):5062–70. doi: 10.1002/alz.13892 (PMC11247696; doi:10.1002/alz.13892), 2024-06-03
Supplement: ALZ-20-5062-s005.pdf [file ALZ-20-5062-s005.pdf]

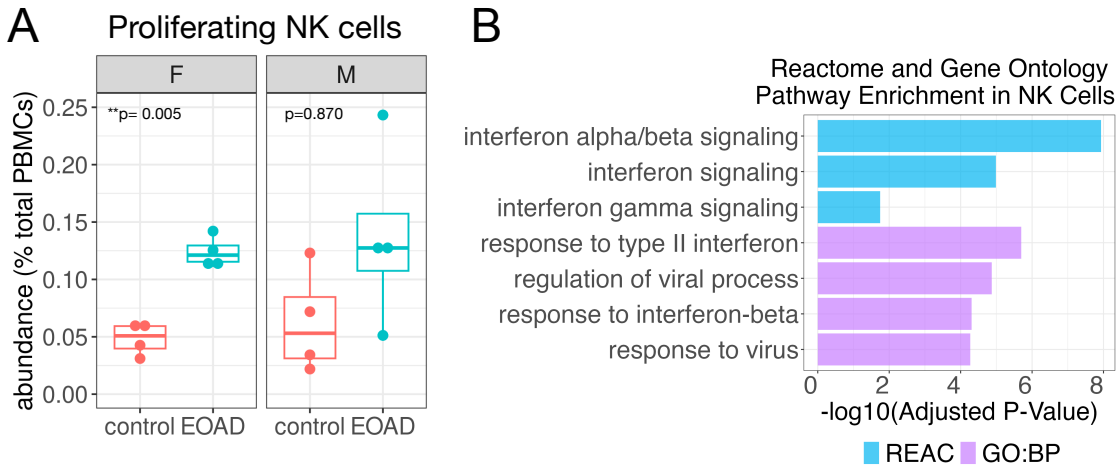

**Figure S4. Analysis of proliferating NK cells and NK cell IFN signaling in EOAD.**

**A**, Quantitative analysis revealed a significant increase in proliferating NK cell abundance specifically in female EOAD cases compared to controls ( $P = 0.005$ ). **B**, Significant upregulation of IFN signaling and antiviral response pathways in NK cells from EOAD patients is demonstrated by querying the GO BP and reactome databases with significantly upregulated genes.
