# Supplementary material for: Expansion of highly interferon‐responsive T cells in early‐onset Alzheimer's disease
Source: PubMed Central journal article supplement — Alzheimers Dement. 2024 Jun 3;20(7):5062–70. doi: 10.1002/alz.13892 (PMC11247696; doi:10.1002/alz.13892), 2024-06-03
Supplement: ALZ-20-5062-s006.pdf [file ALZ-20-5062-s006.pdf]

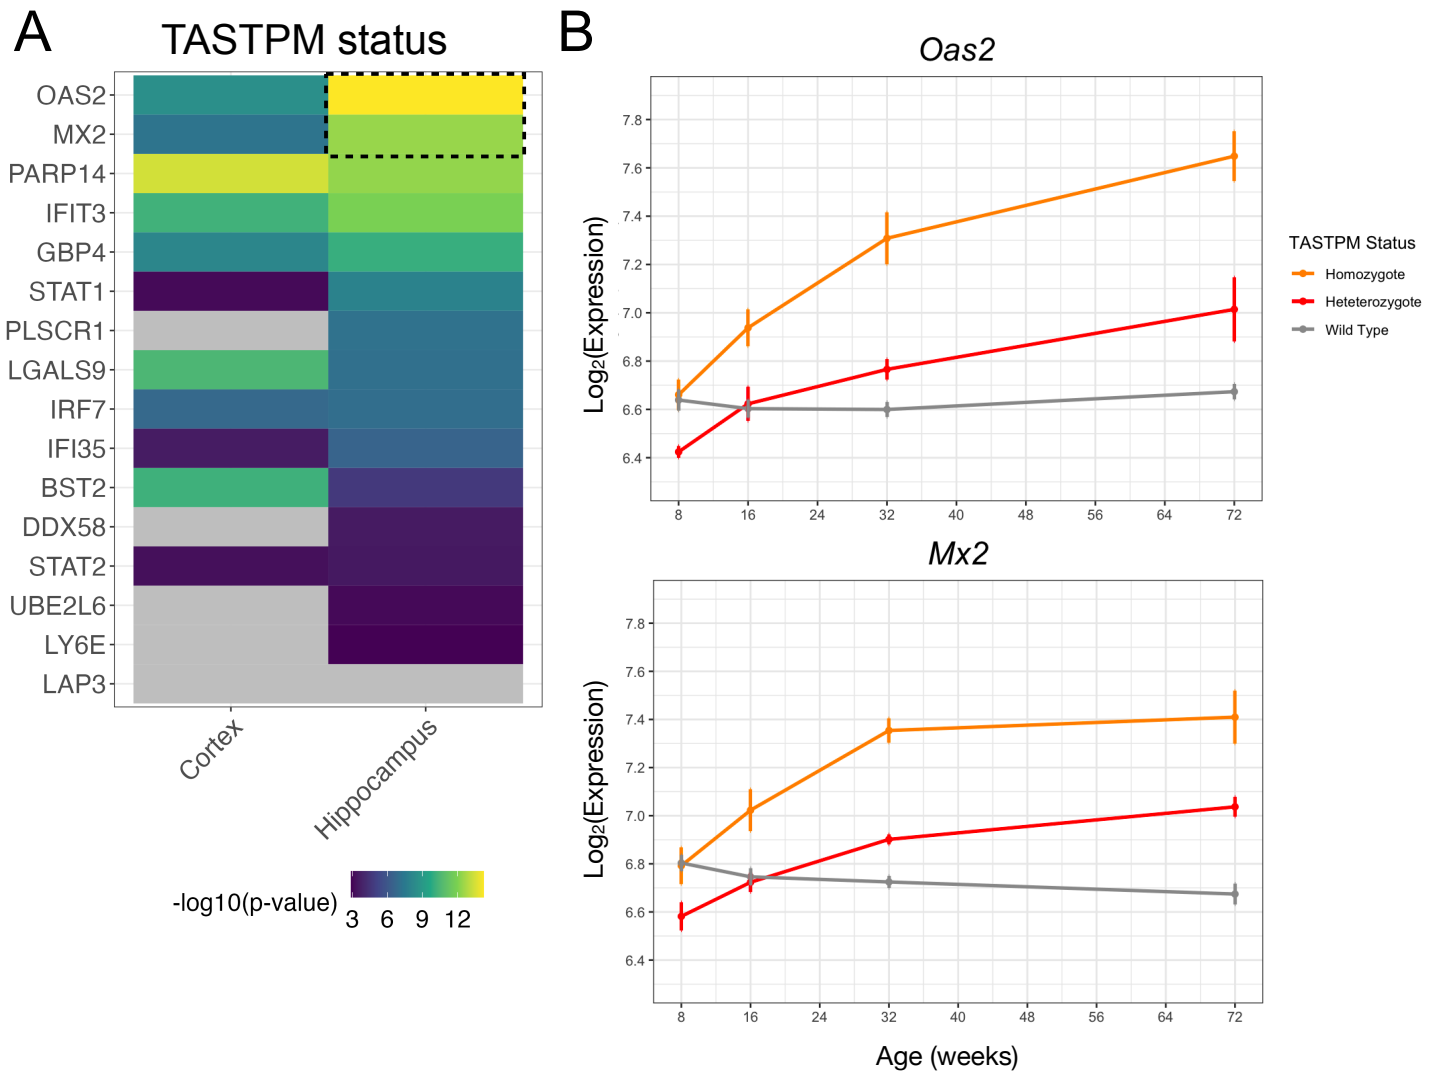

**Figure S7. A mouse model of familial EOAD reveals dysregulation of IFN response genes in hippocampus and cortex.**

**A**, All queried genes are displayed by heatmap in descending order of significance for TASTPM status in the hippocampus. Results are also displayed for the cortex. A total of 15 of the 16 genes queried showed significant dysregulation in mouse hippocampus. Genes not reaching significance for a given region are displayed as gray within the heatmap. **B**, The top two upregulated genes in the hippocampus (*Oas2* and *Mx2*) showed increased expression over time in TASTPM mice relative to WT mice, with TASTPM homozygotes showing greater increases relative to heterozygotes.
