# Supplementary material for: Expansion of highly interferon‐responsive T cells in early‐onset Alzheimer's disease
Source: PubMed Central journal article supplement — Alzheimers Dement. 2024 Jun 3;20(7):5062–70. doi: 10.1002/alz.13892 (PMC11247696; doi:10.1002/alz.13892), 2024-06-03
Supplement: ALZ-20-5062-s009.pdf [file ALZ-20-5062-s009.pdf]

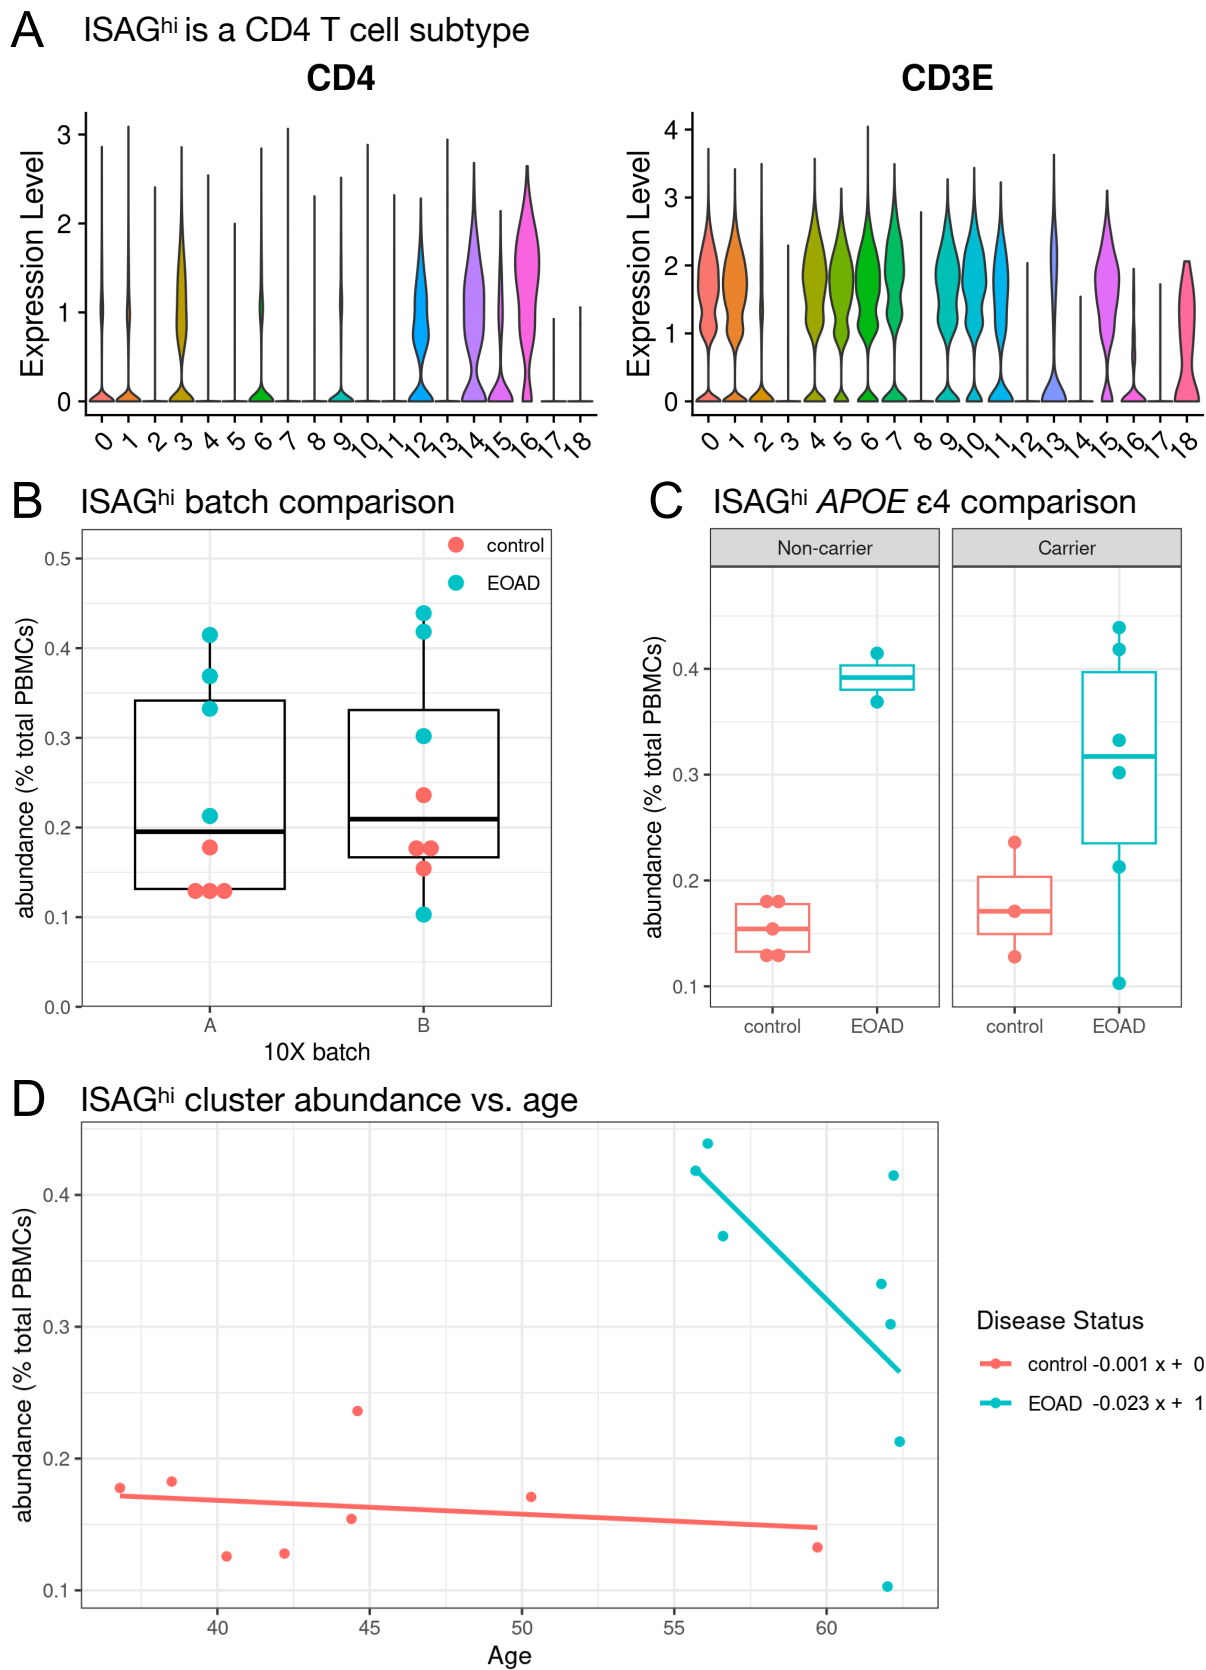

**Figure S1. Analysis of additional variables' relationships with ISAG<sup>hi</sup> T cells.**

**A**, Cluster 15 displays robust expression of both *CD4* and *CD3E*, indicating that it contains CD4 T cells. **B**, Estimated relative abundance of ISAG<sup>hi</sup> T cells (expressed as percentage of total PBMCs) was consistent across two scRNA-seq batches. **C**, *APOE* ε4 carrier status was not clearly associated with ISAG<sup>hi</sup> T-cell abundance in EOAD cases or controls. **D**, Increased age was not associated with increased abundance of ISAG<sup>hi</sup> T cells in EOAD cases or controls.
