# Supplementary material for: Expansion of highly interferon‐responsive T cells in early‐onset Alzheimer's disease
Source: PubMed Central journal article supplement — Alzheimers Dement. 2024 Jun 3;20(7):5062–70. doi: 10.1002/alz.13892 (PMC11247696; doi:10.1002/alz.13892), 2024-06-03
Supplement: ALZ-20-5062-s013.pdf [file ALZ-20-5062-s013.pdf]

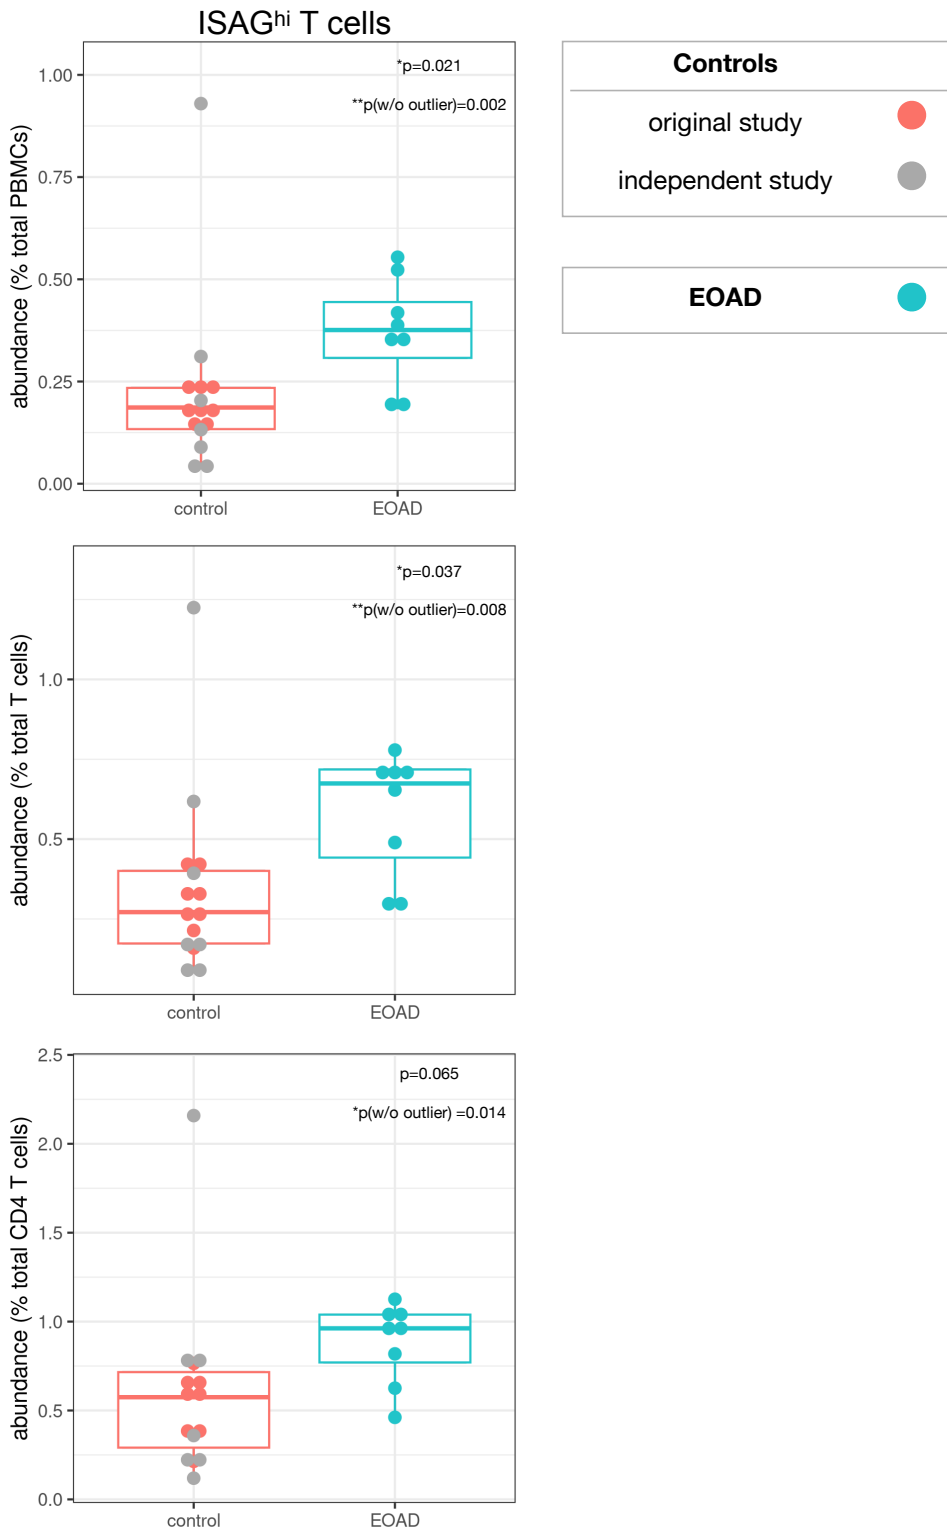

**Figure S2. Reanalysis after integration of additional cognitively normal control samples.**

Seven additional cognitively normal control samples from a prior study (Sirkis and Warly Solsberg et al., 2023) were integrated together with the 16 samples from the present study. ISAG<sup>hi</sup> abundance relative to all PBMCs (top), all T cells (middle), and all CD4 T cells (bottom) was quantified. The increased abundance of ISAG<sup>hi</sup> T cells in EOAD remained significant relative to total PBMCs ( $P = 0.021$ ) and total T cells ( $P = 0.037$ ), while the difference relative to total CD4 T cells remained significant only after removal of the control outlier sample ( $P = 0.014$ ).
