# Supplementary material for: Expansion of highly interferon‐responsive T cells in early‐onset Alzheimer's disease
Source: PubMed Central journal article supplement — Alzheimers Dement. 2024 Jun 3;20(7):5062–70. doi: 10.1002/alz.13892 (PMC11247696; doi:10.1002/alz.13892), 2024-06-03
Supplement: ALZ-20-5062-s014.pdf [file ALZ-20-5062-s014.pdf]

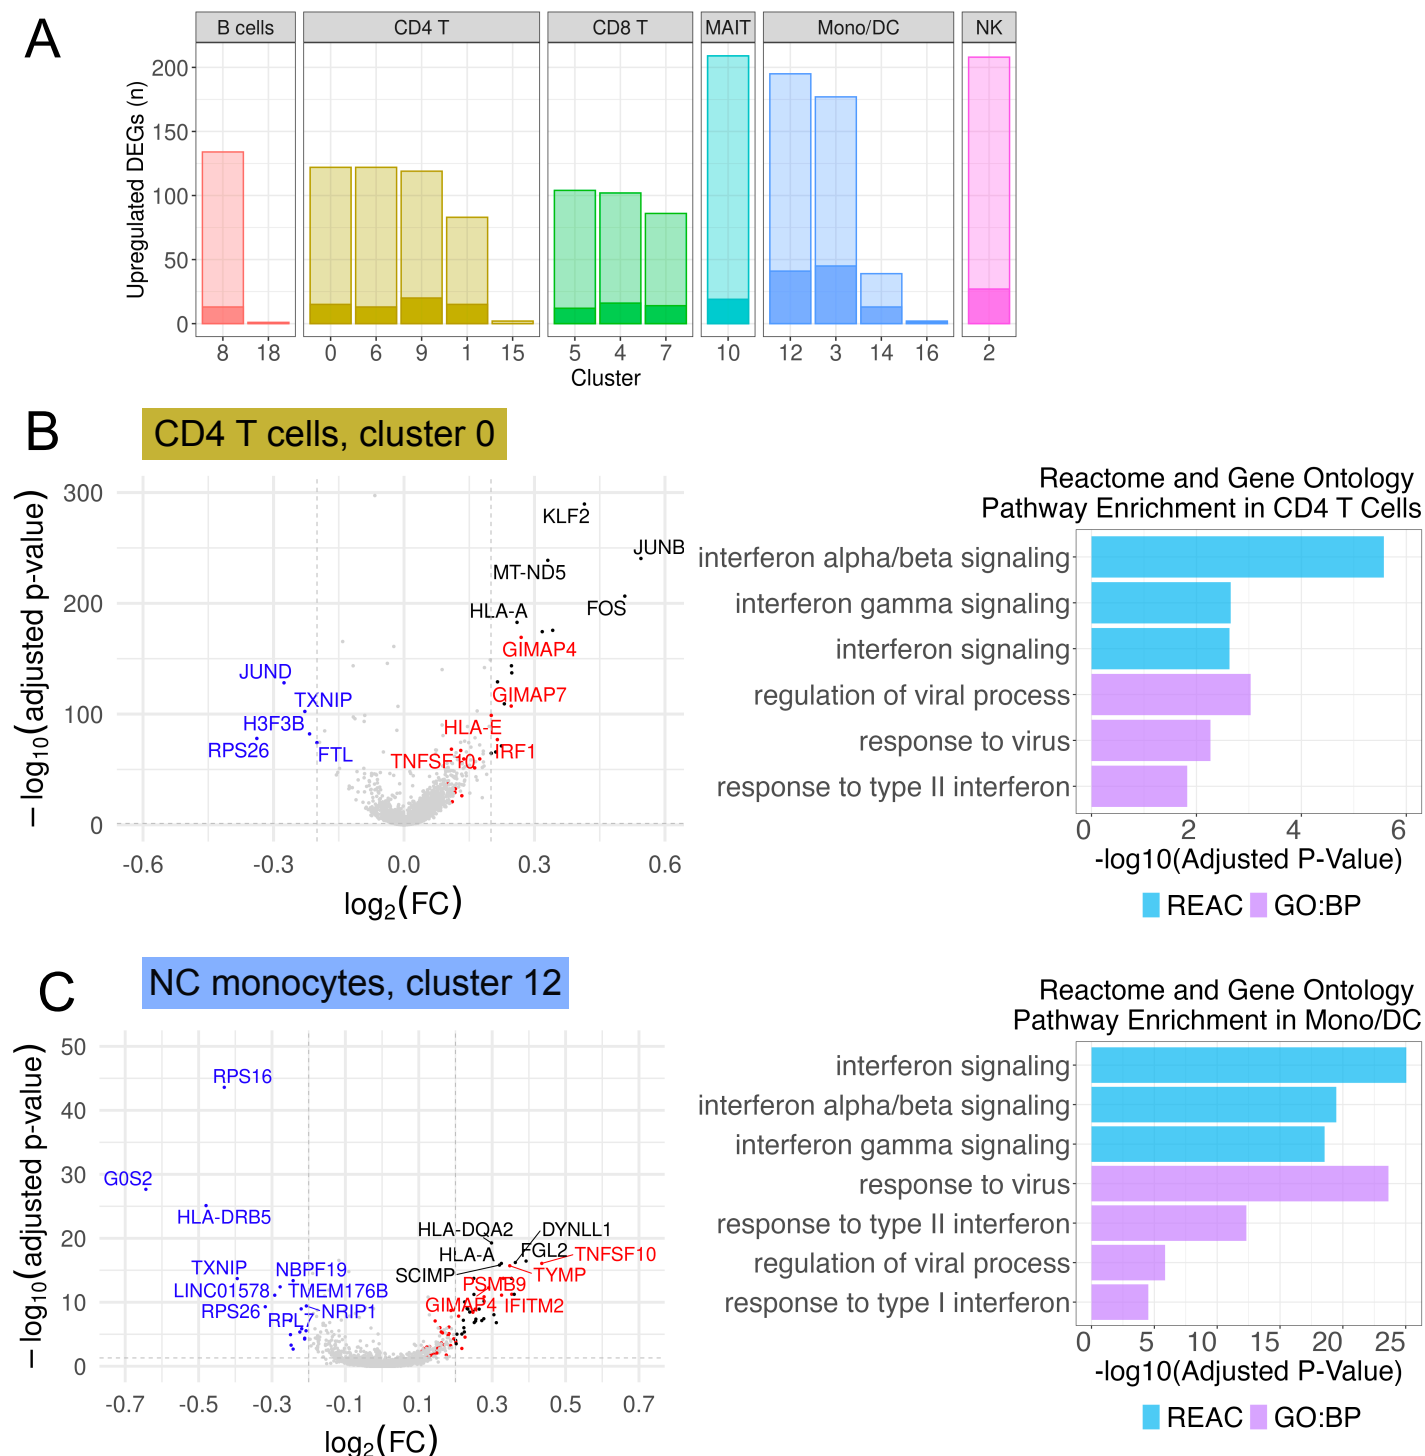

**Figure S5. Differential expression analysis identifies dysregulation of ISAG<sup>hi</sup> T-cell marker genes in additional PBMC types in EOAD.**

**A**, Significantly upregulated genes are displayed across clusters, which are organized by PBMC type. The darker portion of each bar indicates the fraction of upregulated genes that are also ISAG<sup>hi</sup> T-cell marker genes. **B**, **C** (left), Volcano plots for CD4 T cells and NC monocytes (clusters 0 and 12, respectively) display downregulated (blue) and upregulated (black) differentially expressed genes (DEGs); a subset of those with  $P_{FDR} < 0.05$  and absolute LFC  $> 0.25$  are labeled on the plots. In addition, a subset of upregulated genes with  $P_{FDR} < 0.05$  and LFC  $> 0.1$  that are also ISAG<sup>hi</sup> T-cell marker genes are labeled in red. A maximum of 5 genes are labeled for each category to improve readability. **B**, **C** (right), Functional enrichment analysis of the upregulated genes ( $P_{FDR} < 0.05$  and LFC  $> 0.1$ ) in CD4 T cell clusters (**B**) and in monocyte/dendritic cell clusters (**C**). There was significant enrichment of IFN and antiviral response pathways in the CD4 T cell clusters (0, 1, 6, 9, and 15) and the monocyte/dendritic cell clusters (3, 12, 14, and 16) as sourced from the GO BP and reactome databases.
