# Supplementary material for: Expansion of highly interferon‐responsive T cells in early‐onset Alzheimer's disease
Source: PubMed Central journal article supplement — Alzheimers Dement. 2024 Jun 3;20(7):5062–70. doi: 10.1002/alz.13892 (PMC11247696; doi:10.1002/alz.13892), 2024-06-03
Supplement: ALZ-20-5062-s016.pdf [file ALZ-20-5062-s016.pdf]

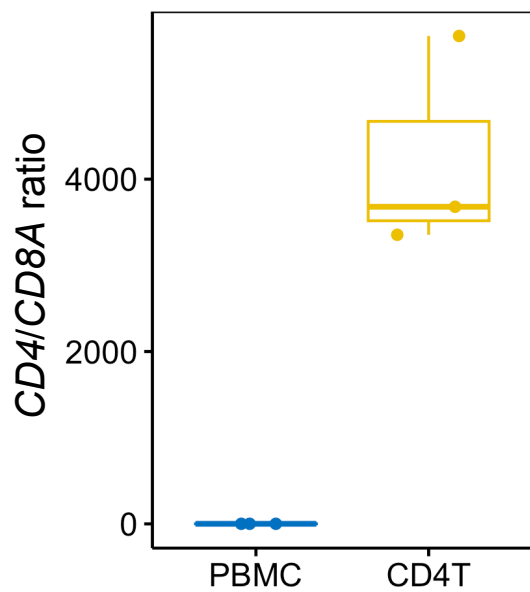

**Figure S6. ddPCR validation of CD4 T-cell isolation.**

ddPCR-based quantification of the *CD4/CD8A* ratio from starting PBMC RNA and isolated CD4 T-cell RNA revealed an ~4,800-fold increase in the *CD4/CD8A* ratio upon CD4 T-cell isolation.
